# Supplementary material for: Fast, efficient fragment-based coordinate generation for Open Babel
Source: PubMed Central journal article supplement (PMC6676618; doi:10.1186/s13321-019-0372-5), 2019-08-01
Supplement: 13321_2019_372_MOESM1_ESM.pdf [file 13321_2019_372_MOESM1_ESM.pdf]

## Supporting Information

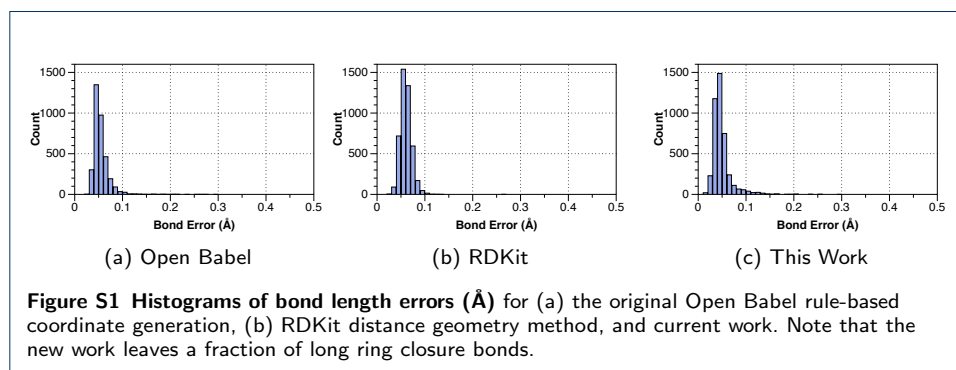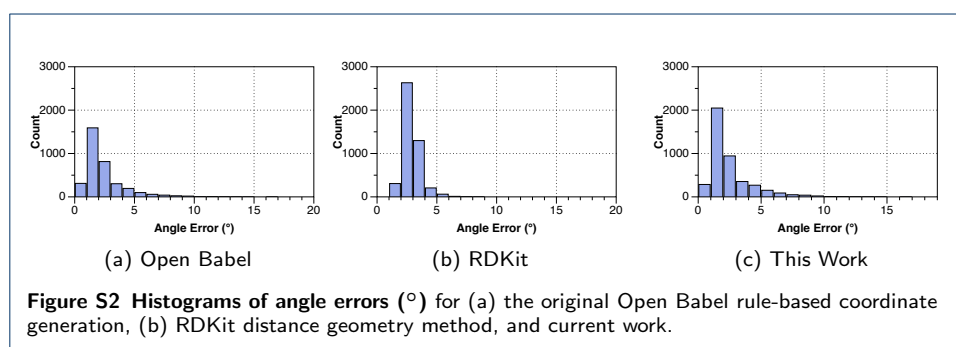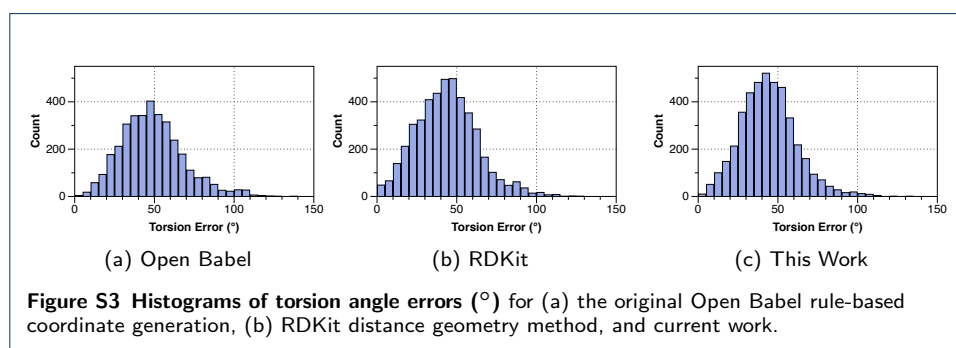

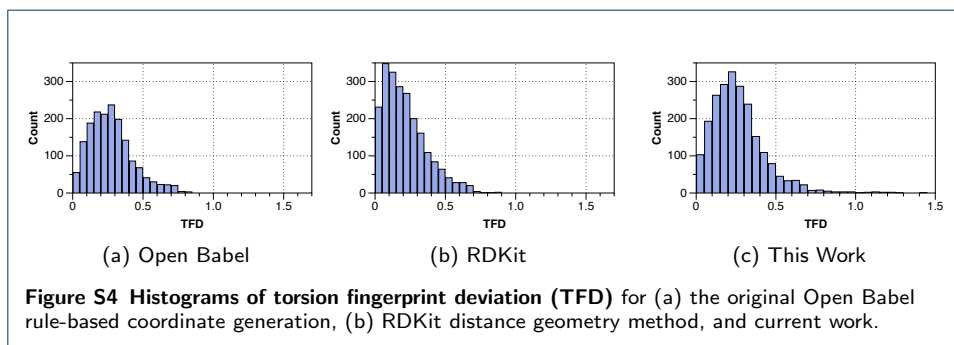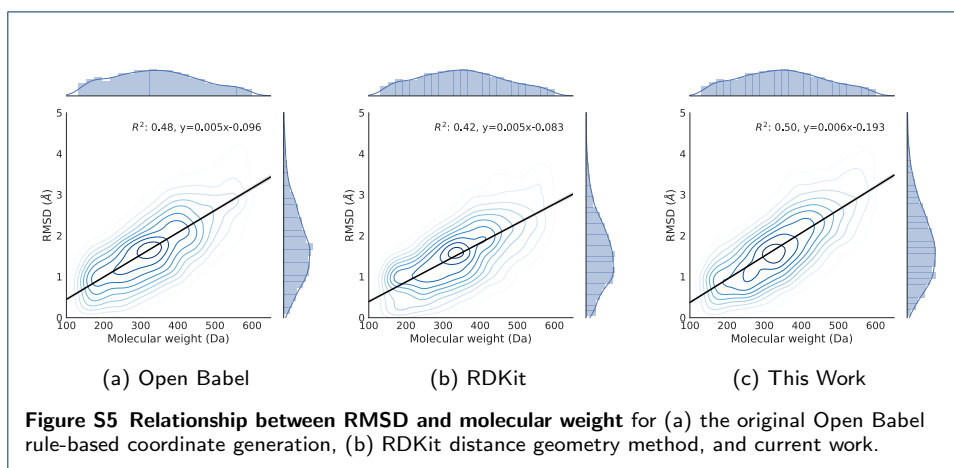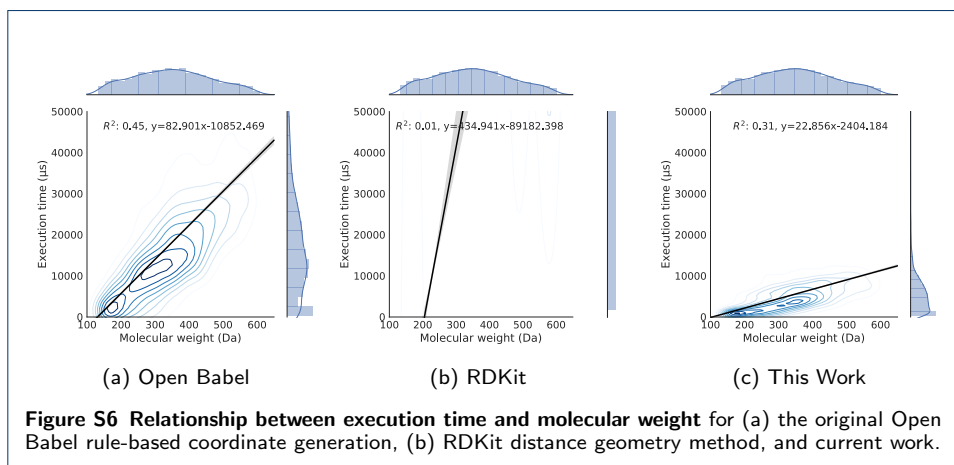

**Table S1** Using increased fragment database (COD + Platinum). The performance on 4548 molecules in the Platinum dataset is shown. Time column shows the total time to process all molecules in second. RMSD column shows mean RMSD in Å. Bond, Angle, Torsion columns show mean error of each (Å, °, °). TFD column shows mean of the torsion fingerprint deviation [34]. Success indicates the percent of predicted molecules whose InChIKey match that of the original molecule. RMSD and mean error are calculated over successful molecules.

| Setting                             | Time  | RMSD | Bond  | Angle | Torsion | TFD  | Success |
|-------------------------------------|-------|------|-------|-------|---------|------|---------|
| Fastest<br>(No MMFF)                | 28.1  | 1.75 | 0.049 | 2.49  | 44.1    | 0.27 | 93.8    |
| Fast<br>(100 MMFF)                  | 411.9 | 1.70 | 0.049 | 2.75  | 43.0    | 0.24 | 94.1    |
| Med<br>(200 MMFF +<br>conf. search) | 744.9 | 1.58 | 0.048 | 2.48  | 42.3    | 0.22 | 94.2    |
| Fastest<br>(COD-only)               | 54.8  | 1.75 | 0.049 | 2.49  | 44.1    | 0.27 | 93.9    |
| Fast<br>(COD-only)                  | 372.7 | 1.72 | 0.049 | 2.90  | 44.1    | 0.26 | 93.6    |
| Med<br>(COD-only)                   | 732.1 | 1.60 | 0.048 | 2.52  | 43.0    | 0.23 | 93.9    |
